# Supplementary material
Source: PubMed Central journal article supplement (PMC3631690)
Supplement: 1303437110_pnas.201303437SI.pdf [file 1303437110_pnas.201303437SI.pdf]

# Supporting Information

Kueffer et al. 10.1073/pnas.1303437110

## SI Text

**Sample Sizes for Biodistribution Studies.** Single liposome injection (Fig. 2A): 18 h, n = 9; 30 h, n = 10; 48 h, n = 16.

Double liposome injection (Fig. 2B): 42 h, n = 9; 48 h, n = 4; 54 h, n = 9; 72 h, n = 7; 96 h, n = 4.

**CI<sub>s</sub> (95%) for Median Time to Reach Tumor Volume of 500 mm<sup>3</sup>.**

Control: median = 12 d; lower CI = 8.95 d; upper CI = 15.05 d.

Neutron only: median = 14 d; lower CI = 9.79 d; upper CI = 18.21 d.

Boron neutron capture therapy (BNCT): median = 22 d; lower CI = 20.15 d; upper CI = 23.85 d.

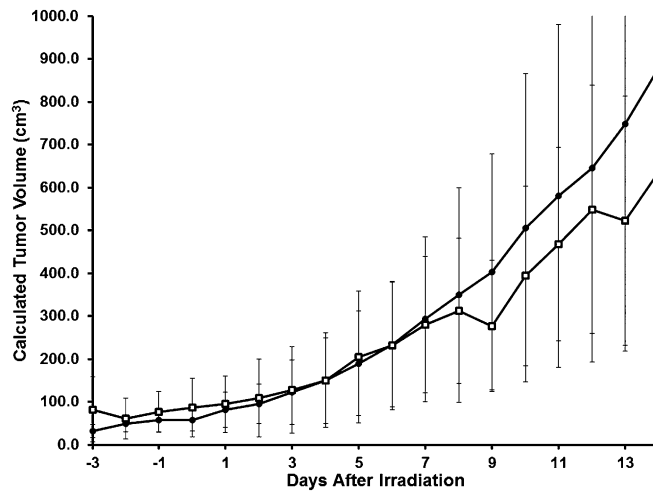

**Fig. S1.** Comparison of tumor volume increase between control group and group given a 30-min neutron irradiation: ●, control group; □, "neutron-only" group. Error bars depict  $\pm$  SD.

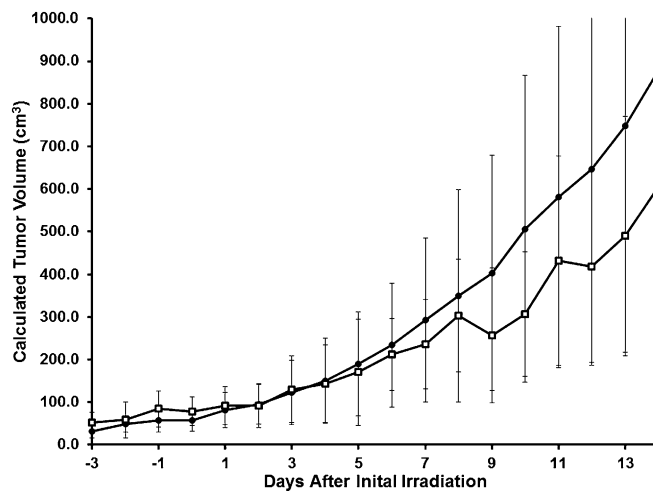

**Fig. S2.** Comparison of tumor volume increase between control group and group given a 1-h neutron irradiation: ●, control group; □, neutron-only group. Error bars depict  $\pm$  SD.
